# Supplementary material
Source: Research Square preprint supplement (doi:10.21203/rs.3.rs-9728344/v1)

**Graphical Abstract**


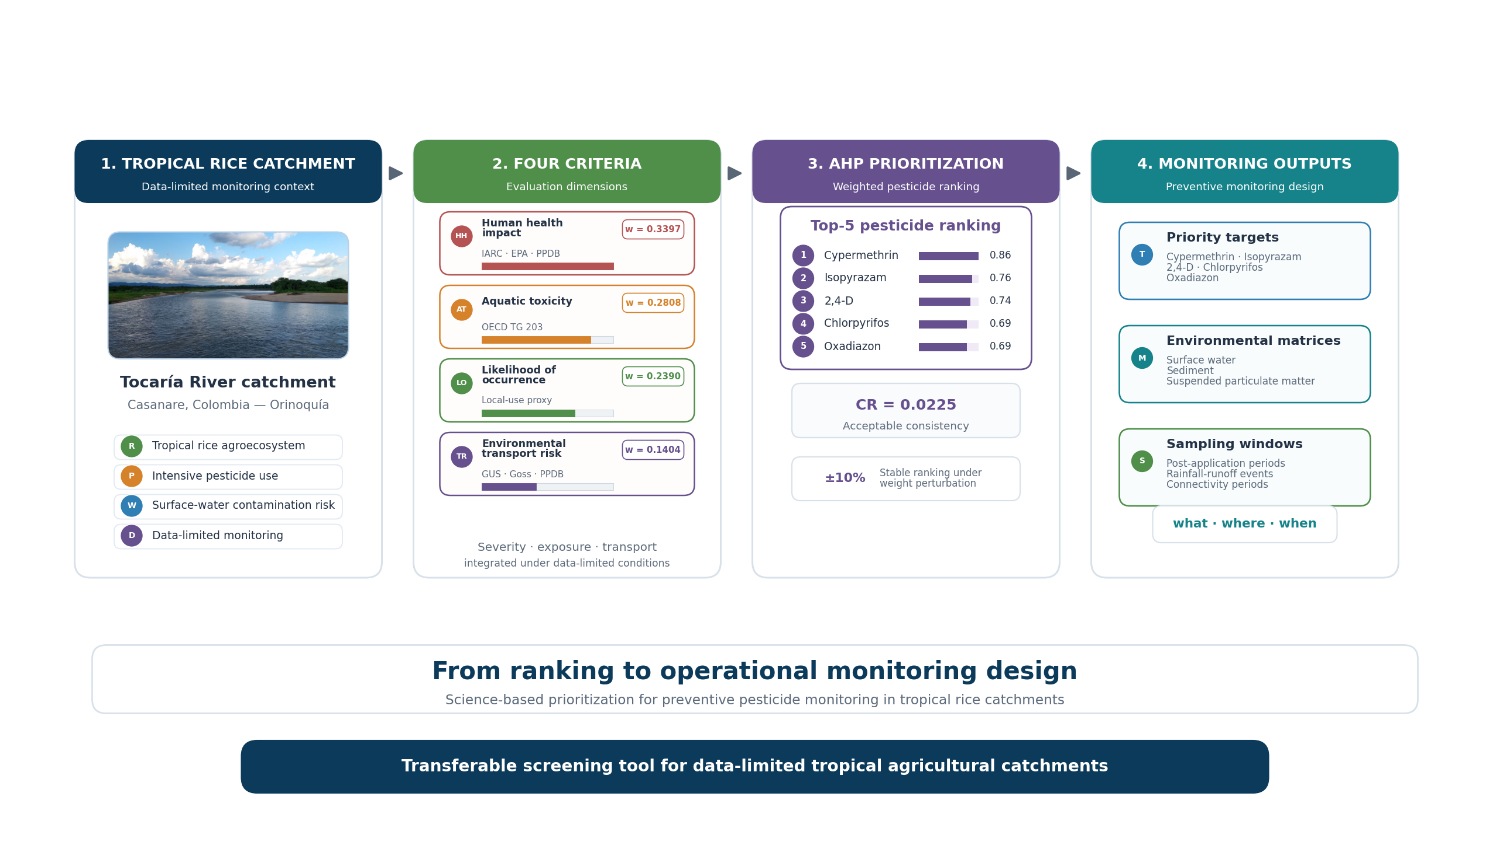

Supplement: Supplementary file 1 [file e5f2c40ff6c546bb781426ce.docx]
